# Supplementary material
Source: MDPI journal article supplement (https://www.mdpi.com/2073-4344/9/1/13)
Supplement: s1 [file s1]

# A Comparative Study of MFI Zeolite Derived from Different Silica Sources: Synthesis, Characterization and Catalytic Performance

Jianguang Zhang <sup>1</sup>, Xiangping Li <sup>2,\*</sup>, Juping Liu <sup>2</sup> and Chuanbin Wang <sup>2</sup>

<sup>1</sup> School of Petroleum engineering, China University of Petroleum (East China), Qingdao 266580, China; eduzjg@163.com

<sup>2</sup> School of Environmental Science and Engineering/China-Australia Centre for Sustainable Urban Development, Tianjin University, Tianjin 300072, China; liujuping123@163.com (J.P.L); wangchuanbin6@163.com (C.B.W.)

\* Correspondence: xiangping.li@tju.edu.cn; Tel.: +86-022-8740-2075

**Table S1.** Amount of agents needed for spherical silica during the synthesis process.

| Particle Size of Spherical Silica (nm) | a (28%NH <sub>3</sub> ·H <sub>2</sub> O, mL) | b (mL)                           |                                    | d (TEOS, mL) |     | e (mL)                                                             |    |
|----------------------------------------|----------------------------------------------|----------------------------------|------------------------------------|--------------|-----|--------------------------------------------------------------------|----|
|                                        |                                              | C <sub>2</sub> H <sub>5</sub> OH | n-C <sub>3</sub> H <sub>7</sub> OH |              |     | C <sub>2</sub> H <sub>5</sub> OHn-C <sub>3</sub> H <sub>7</sub> OH |    |
| 50                                     | 2                                            | 14                               | 0                                  | 0            | 4   | 36                                                                 | 0  |
| 100                                    | 4                                            | 40                               | 0                                  | 0            | 2   | 20                                                                 | 0  |
| 300                                    | 3                                            | 0                                | 0                                  | 13.8         | 1.5 | 15.2                                                               | 0  |
| 500                                    | 5                                            | 0                                | 14                                 | 0            | 6   | 0                                                                  | 36 |

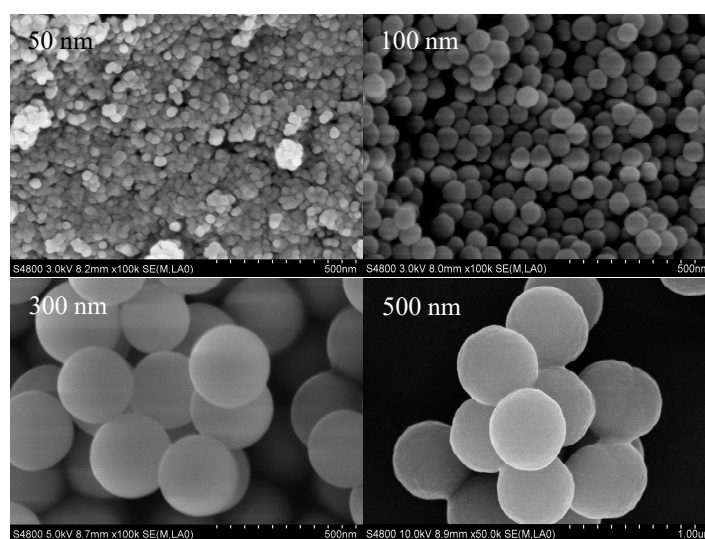

**Figure S1.** SEM images of silica sphere with different particle sizes.

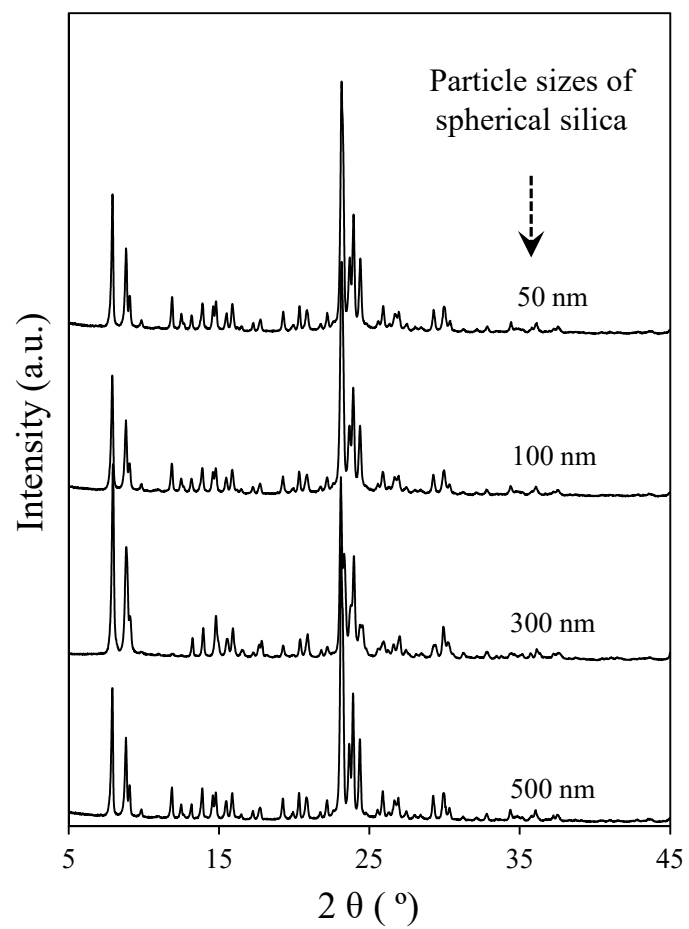

**Figure S2.** XRD patterns of silicalite-1 synthesized with silica spheres of different particle sizes.
